# Supplementary material for: Elucidating the role of PdAgFe charge transfer in ternary aerogels for boosting electro-oxidative degradation of recalcitrant di-butyl phthalate
Source: Royal Society of Chemistry journal article supplement (doi:10.1039/d6ra00270f), 2026-06-01
Supplement: d6ra00270f1.pdf [file d6ra00270f1.pdf]

## Supplementary Information

### **Elucidating the Role of PdAgFe Charge Transfer in Ternary Aerogels for Boosting Electro-Oxidative Degradation of Recalcitrant Di-butyl Phthalate**

Sammia Khurshid<sup>1</sup>, Muzammil Anjum<sup>1</sup>, Rab Nawaz<sup>2</sup>, Sahar Saleem<sup>3</sup>, Marlia Mohd Hanafiah<sup>2,4</sup>,  
Azeem Khalid<sup>1</sup>, Muhammad Umair<sup>5</sup>

<sup>1</sup>Department of Environmental Sciences, PMAS Arid Agriculture University, 46300-Rawalpindi,  
Pakistan

<sup>2</sup>Centre for Tropical Climate Change System, Institute of Climate Change, Universiti  
Kebangsaan Malaysia (UKM), 43600-Bangi, Selangor, Malaysia

<sup>3</sup>National University of Sciences and Technology (NUST), Islamabad, 44000, Pakistan

<sup>4</sup>Department of Earth Sciences and Environment, Faculty of Science and Technology, Universiti  
Kebangsaan Malaysia (UKM), 43600-Bangi, Selangor, Malaysia

<sup>5</sup>Faculty of Agricultural Engineering & Technology, PMAS-Arid Agriculture University,  
Rawalpindi 46000, Pakistan

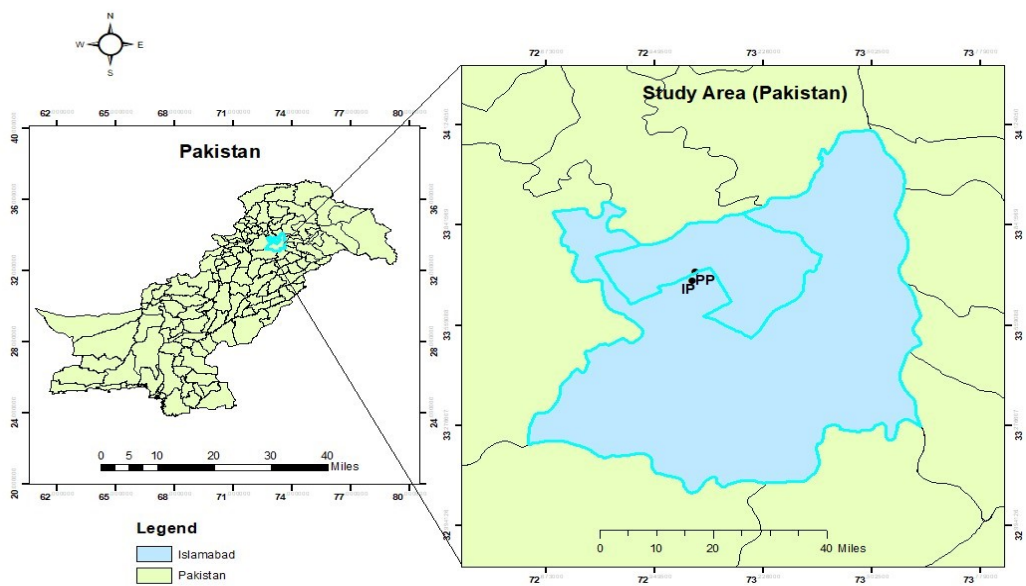

**Fig. S1:** Illustration of sampling points from selected industries located in Islamabad.

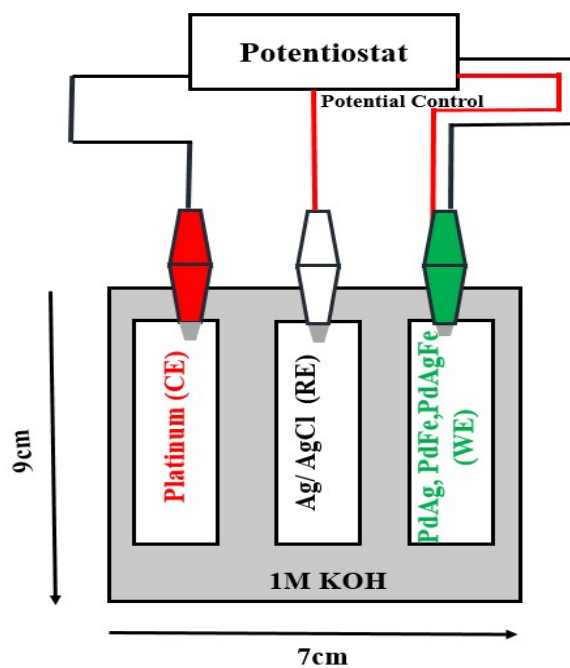

**Fig. S2.** Electrode Assembly in electrocatalytic cell

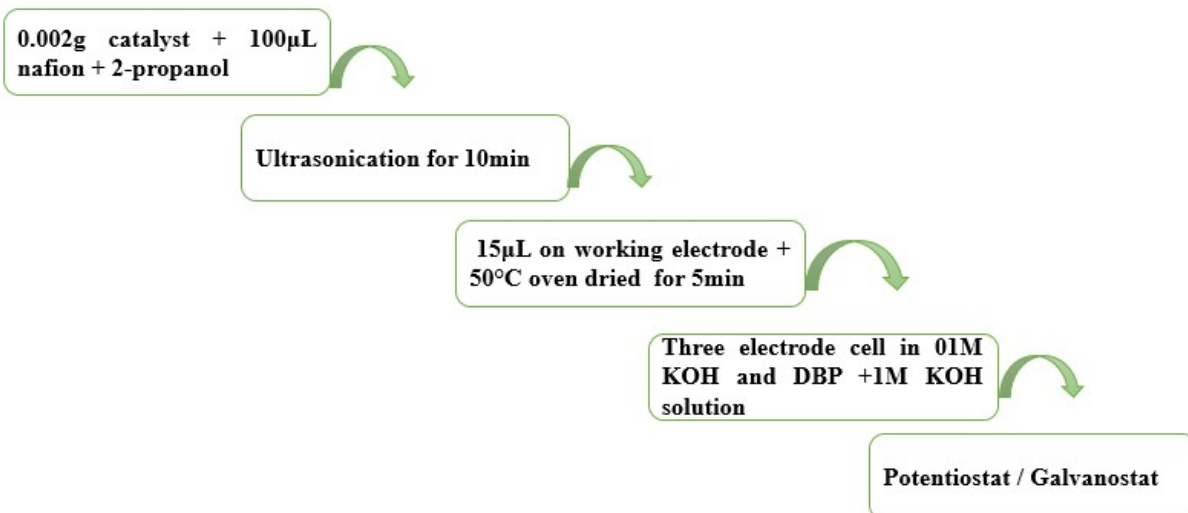

**Fig. S3:** Figure Schematic representation of the electrode preparation procedure

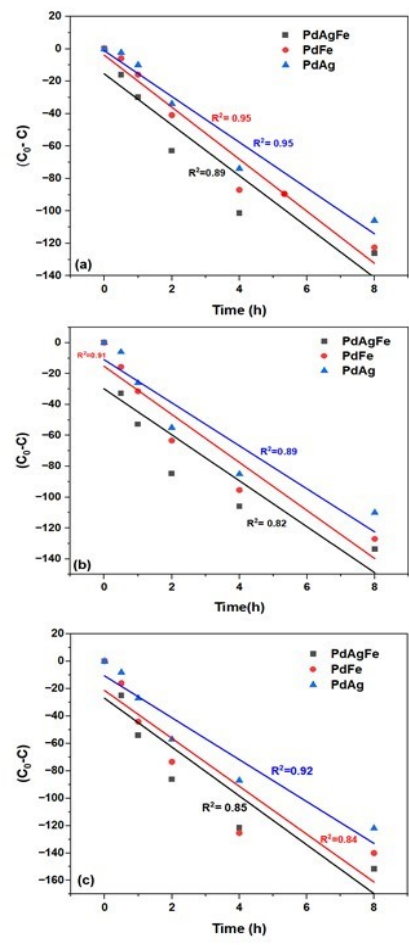

**Fig. S4:** Zero order Kinetic of COD removal by PdAgFe, PdFe, PdAg electrocatalyst at 30ppm (a) 60ppm (b) and 90ppm (d)

**Table S1.** Physicochemical characterization of industrial wastewater

| <b>Industries</b> | <b>pH</b> | <b>EC<br/>μS/cm</b> | <b>TDS<br/>(ppm)</b> | <b>TSS<br/>(%)</b> | <b>VS (%)</b> | <b>Turbidity<br/>(NTU)</b> | <b>COD<br/>(mg/L)</b> |
|-------------------|-----------|---------------------|----------------------|--------------------|---------------|----------------------------|-----------------------|
| <b>PP</b>         | 6.59      | 1.83                | 143                  | 1                  | 60            | 4.05                       | 748.8                 |
| <b>IP</b>         | 6.89      | 0.975               | 220                  | 0.5                | 42            | 1.85                       | 665.6                 |
| <b>S.D</b>        | ± 0.15    | ± 0.42              | ± 38.5               | ± 0.25             | ± 9           | ± 1.1                      | ± 41.6                |

**Table S2.** Gas Chromatography Mass Spectrometry

| <b>Retention Time (min)</b> | <b>Compound Name</b>                | <b>Match Quality</b> | <b>Peak Area</b> | <b>Relative Area (%)</b> |
|-----------------------------|-------------------------------------|----------------------|------------------|--------------------------|
| <b>PP industry sample</b>   |                                     |                      |                  |                          |
| <b>2.531</b>                | Ethylbenzene                        | 90                   | 11,846,470       | 1.48                     |
| <b>12.295</b>               | Phenol, 2,4-bis(1,1-dimethylethyl)- | 97                   | 7,059,937        | 0.88                     |
| <b>22.105</b>               | Diisooctyl phthalate                | 91                   | 737,329,1        | 92.23                    |
| <b>IP industry sample</b>   |                                     |                      |                  |                          |
| <b>2.531</b>                | Ethylbenzene                        | 90                   | 11,846,470       | 1.48                     |
| <b>12.295</b>               | Phenol, 2,4-bis(1,1-dimethylethyl)- | 97                   | 7,059,937        | 0.88                     |
| <b>22.105</b>               | Diisooctyl phthalate                | 91                   | 737,329,1        | 92.23                    |
